# Supplementary material
Source: Springer Nature journal article supplement (https://www.springermedizin.de/resource/supplementary/13012_2013_717_MOESM5_ESM.docx/9630314)
Supplement: MOESM5 [file 9630314]

**Table 2. Composite process score calculated for each patient as primary process outcome.**

| **Quality indicator**  (for each patient receives a score) | **Diabetes**  (maximum score = 6) | **IHD**  (maximum score = 6) | **Both Diabetes+IHD**  (multiply by 6/7 for max score =6) |
| --- | --- | --- | --- |
| BP test in 6M | X | X | X |
| A1C test in 6M | X |  | X |
| FBG test in 24M |  | X |  |
| LDL test in 12M | X | X | X |
| ACR test in 12M | X |  | X |
| Rx ASA |  | X | X |
| Rx Statin | X | X | X |
| Rx ACE/ARB | X | X | X |

IHD=ischemic heart disease, BP = blood pressure, A1C = haemoglobin A1c, FBG = fasting blood glucose, LDL = low density lipoprotein cholesterol, ACR = urinary albumin-to-creatinine ratio, ASA = aspirin, ACE/ARB = angiotensin-modifying agent
